# Supplementary material for: Influence of high glucose on mesangial cell-derived exosome composition, secretion and cell communication
Source: Sci Rep. 2019 Apr 18;9:6270. doi: 10.1038/s41598-019-42746-1 (PMC6472340; doi:10.1038/s41598-019-42746-1)

## **Supplemental Figures**

### **Influence of high glucose on mesangial cell-derived exosome composition, secretion and cell communication**

<sup>1</sup>Antônio da Silva Novaes, <sup>1</sup>Fernanda Teixeira Borges, <sup>1</sup>Edgar Maquigussa,

<sup>1</sup>Vanessa Araújo Varela, <sup>2</sup>Marcos Vinicios Salles Dias, <sup>1</sup>Mirian Aparecida Boim

<sup>1</sup>Renal Division, Department of Medicine, Federal University of São Paulo,

<sup>2</sup>International Research Center; AC Camargo Cancer Center.

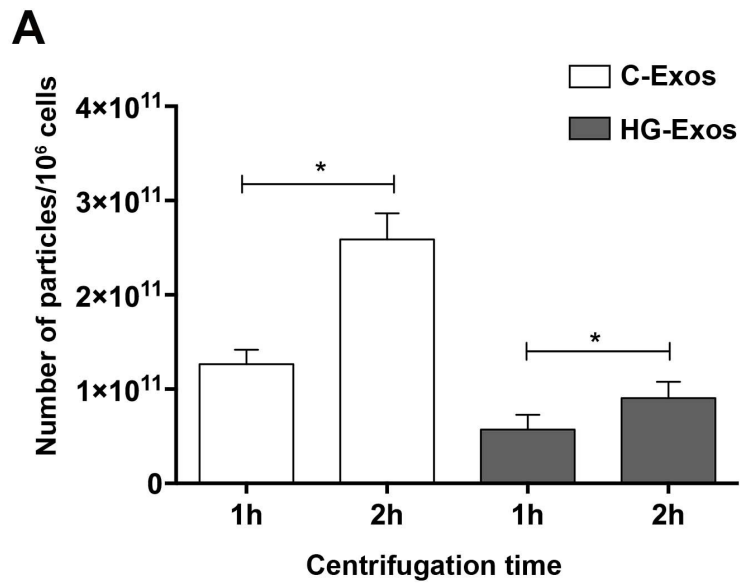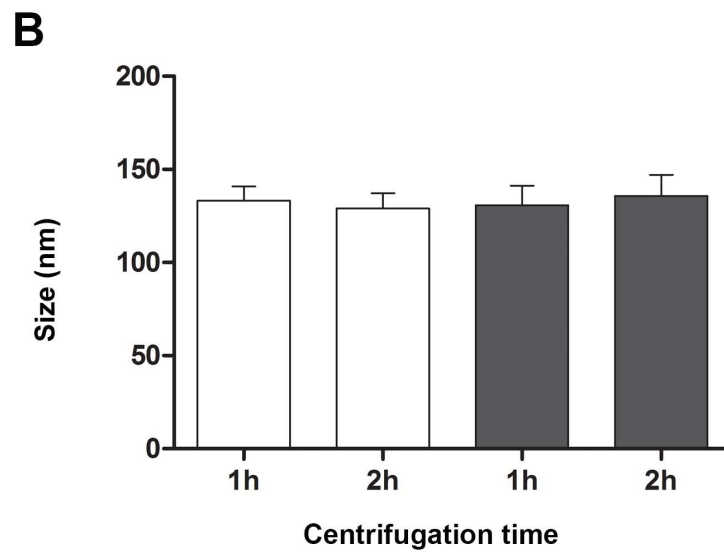

**Supplemental Figure 1** – Number of particles obtained after ultracentrifugation for 1 or 2 hours. Data are shown as mean  $\pm$  standard error (SE). \* $p < 0.05$ .

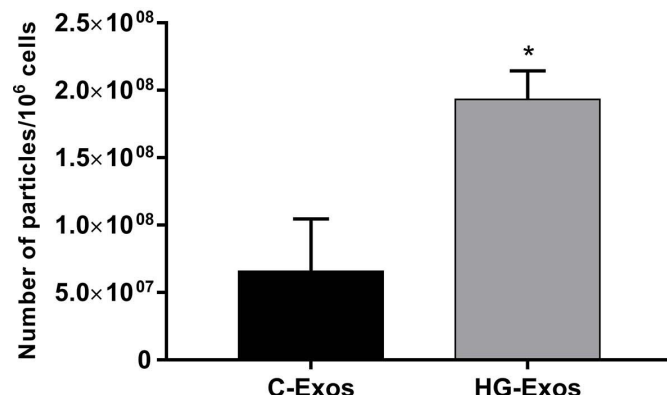

**Supplemental Figure 2** – Concentration of exosomes released by  $10^6$  cells. HMCs from different passages were grown on 6-well plates in culture medium supplemented with 5 or 30 mM glucose. After 24 hr of incubation, the exosomes were isolated from the culture medium with 5 mM (c-Exos) or 30 mM (HG-Exos) and the adhered HMCs were trypsinized and counted in an automatic counter. Six independent experiments were performed. Data are shown as mean  $\pm$  standard error (SE). \* $p < 0.001$ .

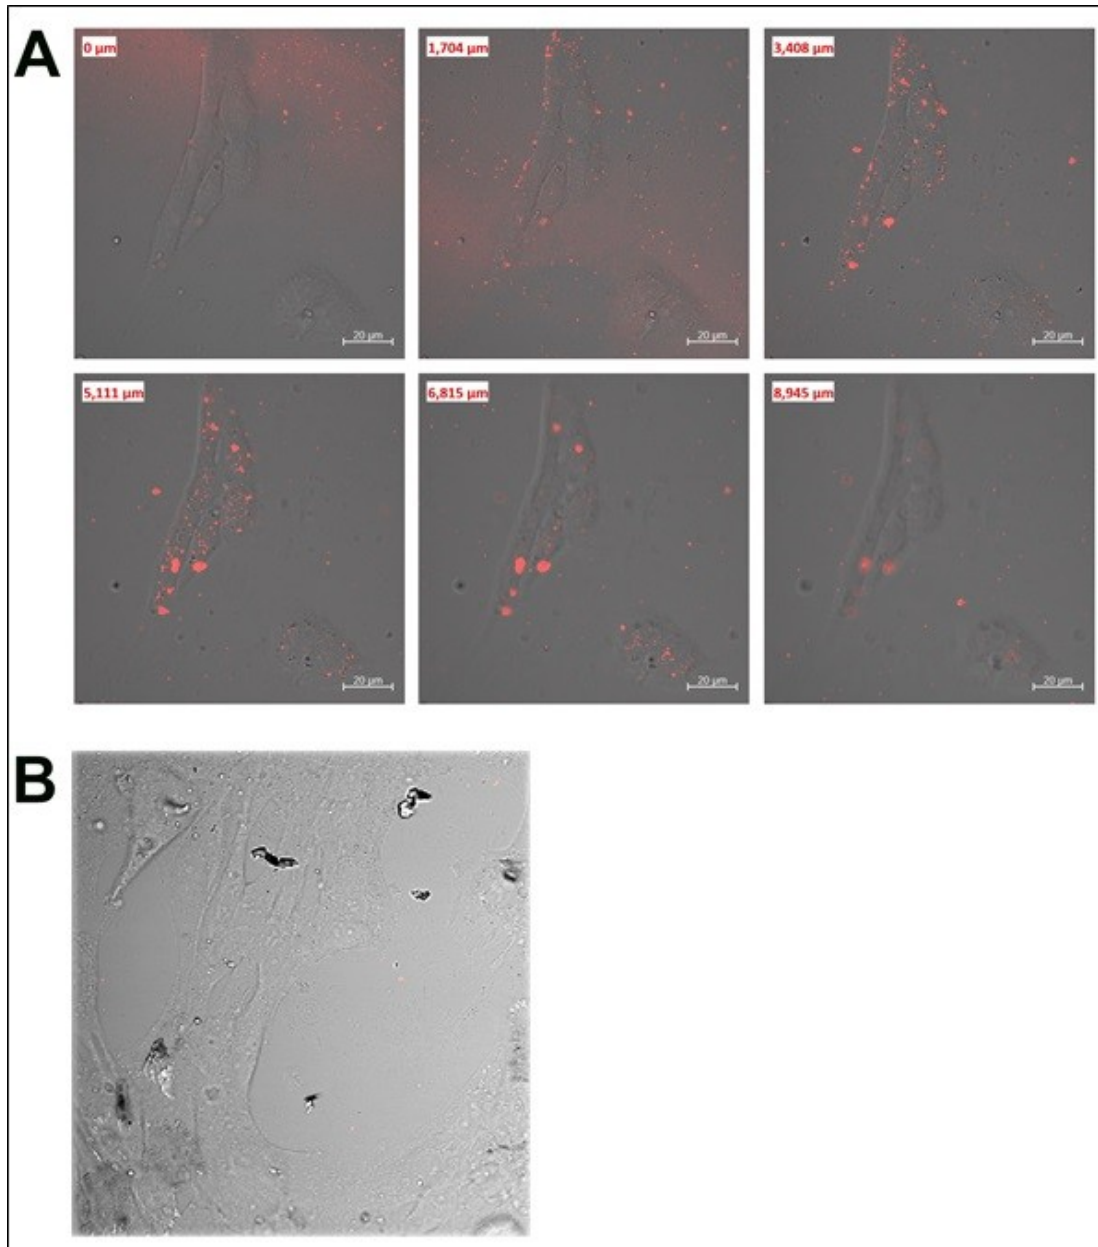

**Supplemental Figure 3** – Incorporation of HG-Exos by normal HMC. A - Fluorescence intensity images after 3 hr of addition and HG-Exos labeled with PKH26 (red) at different depths (z) of normal HMC. B – Negative control. The addition of 50 uM of PKH26 labeling was not observed in cells after 3hr of incubation.

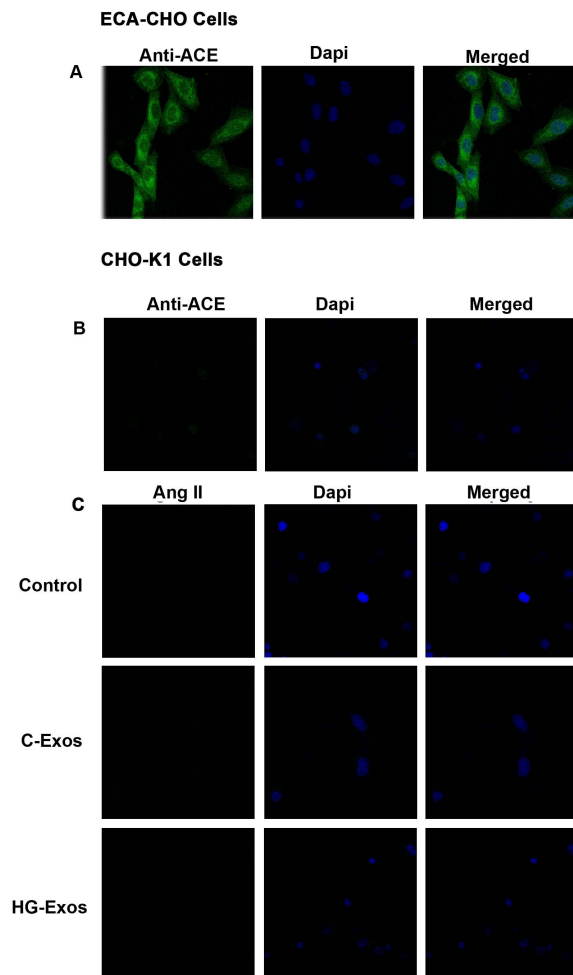

**Supplemental Figure 4** – Synthesis of AngII in CHO-K1 incubated with C-Exos and HG-Exos. Chinese hamster ovary cells were incubated with C-Exos and HG-Exos. After 24 h, we evaluated AngII synthesis by immunofluorescence under confocal microscopy. A – Staining for ACE (green) was observed in ACE-CHO cells. B – Staining for angiotensin converting enzyme (ECA) (green) was not observed in CHO-K1 cells. C – AngII labeling was not observed in untreated CHO-K1 (control). The labeling for AngII (green) was not observed in CHO-K1 treated with C-Exos and HG-Exos. The images are representative of three independent experiments. Magnification of 630x. The nuclei were stained with DAPI (blue).

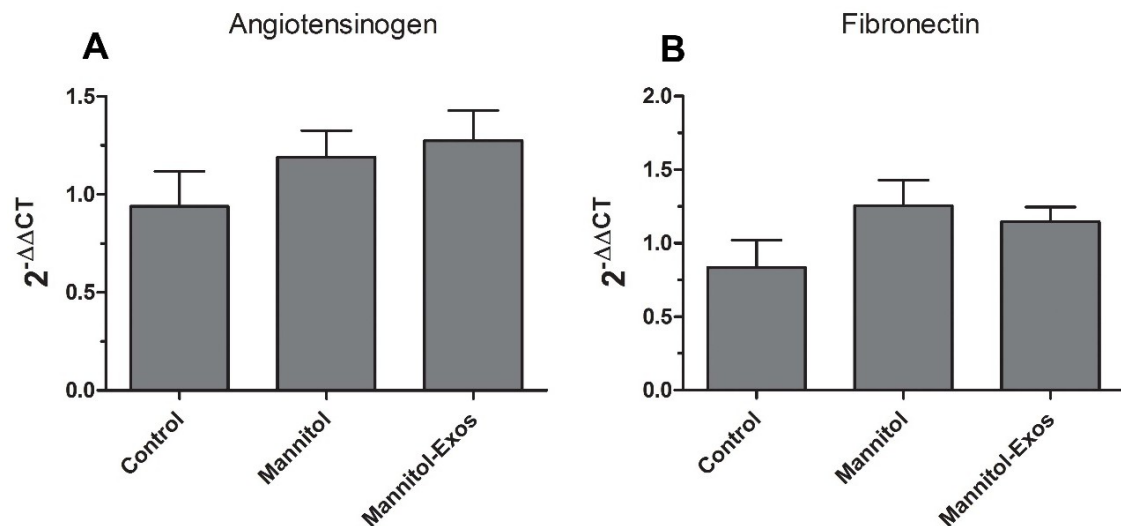

**Supplemental Figure 5 - Real-time PCR for angiotensinogen and fibronectin in HMCs.** Normal HMCs were incubated during 24 hr with mannitol (30mM) or with Exos derived from mannitol-stimulated HMCs (mannitol-Exos). After 24 hr, the gene expressions for angiotensinogen (AGT) (A) and fibronectin (B) were evaluated by real time PCR. The results are expressed as the means  $\pm$  standard error of the mean (SEM).

**Unprocessed Original Scans for all of the blots in figures 2, 4, 6 and 7**

**Figure 2E**

**CD63**

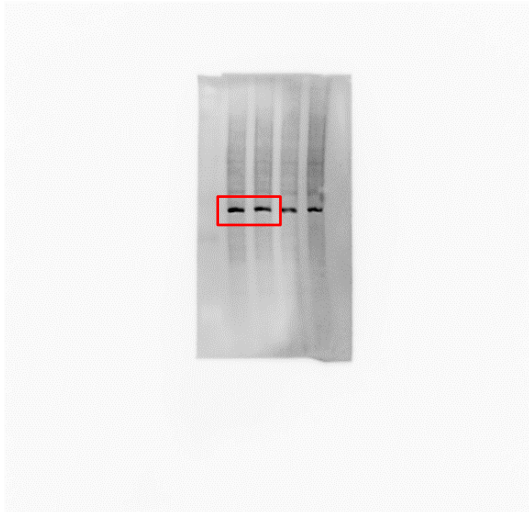

**CD81**

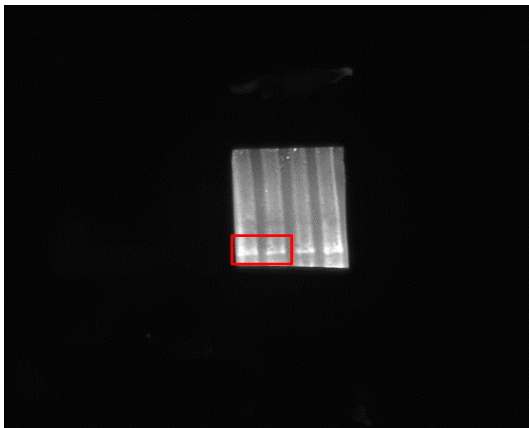

## Calnexin

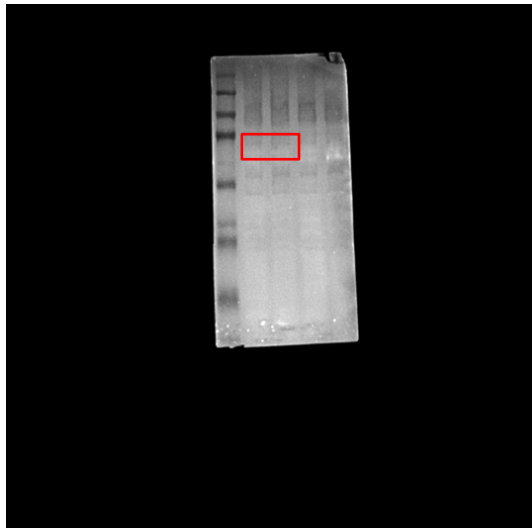

Figure 4 A

## AGT

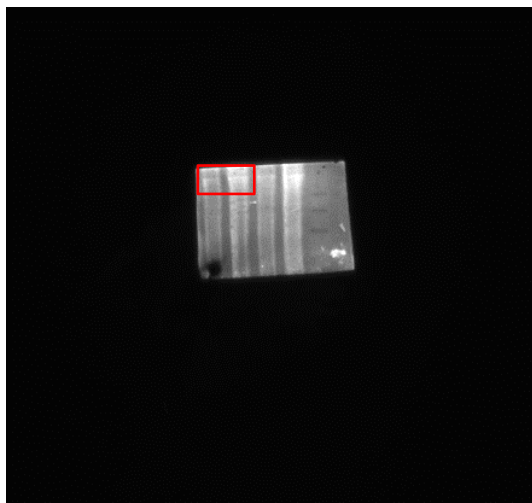

## Renin

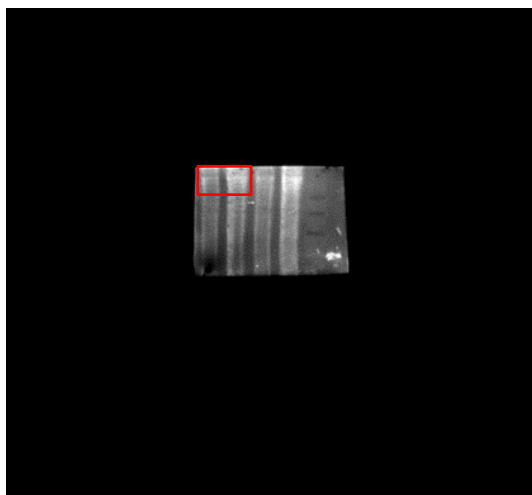

**CD63**

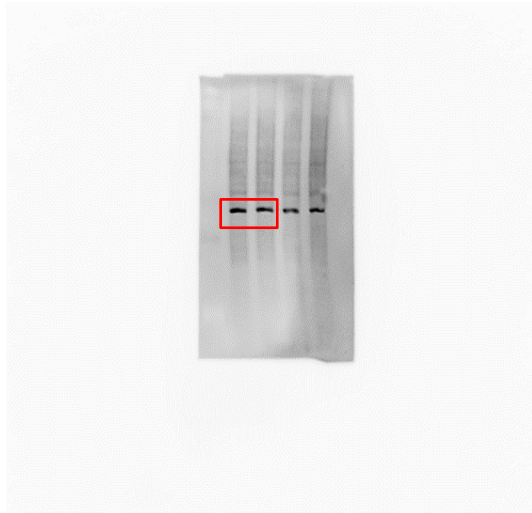

**Figure 4 D**

**ACE**

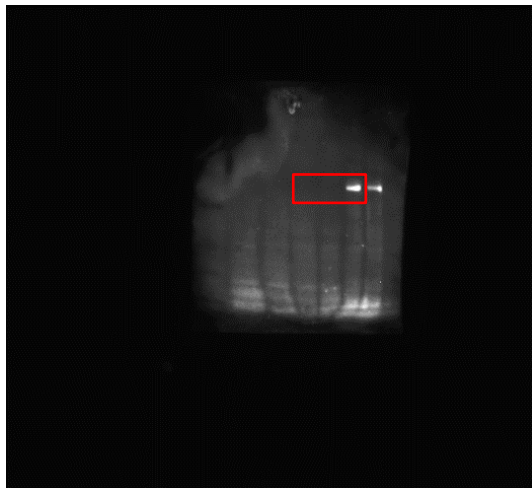

**CD63**

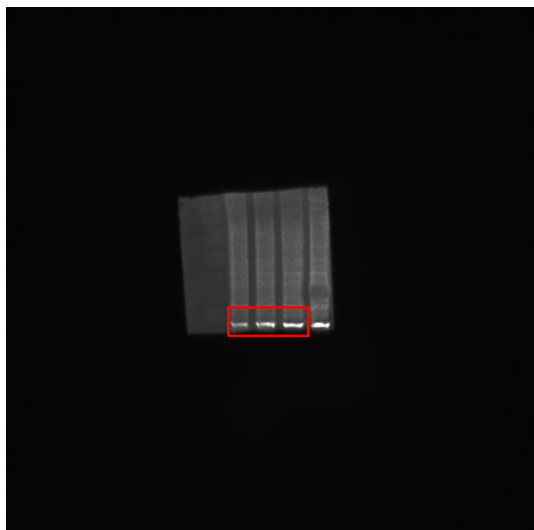

**Figure 6E**

**AT<sub>1</sub>**

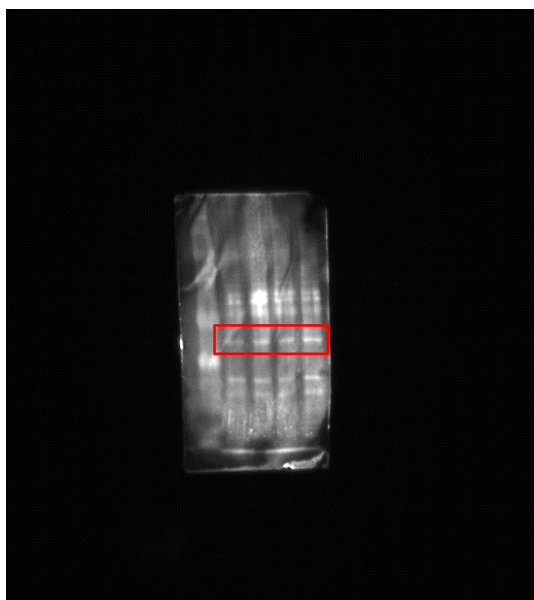

**AT<sub>2</sub>**

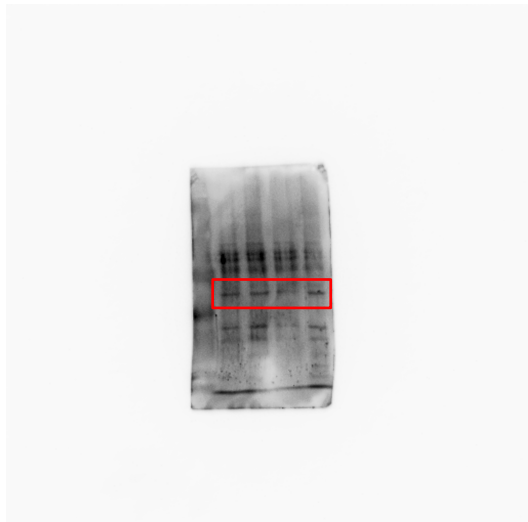

**Histone**

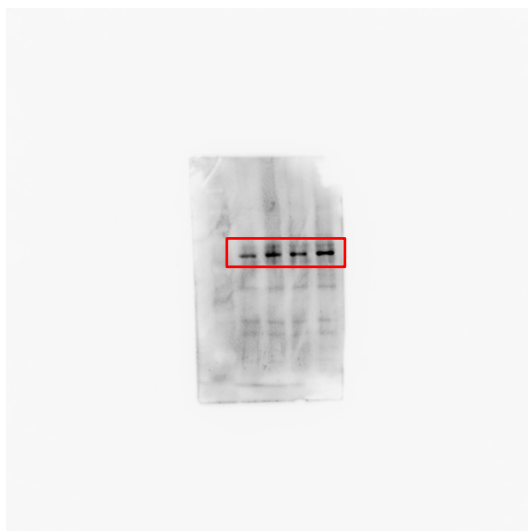

**$\alpha$  - actin**

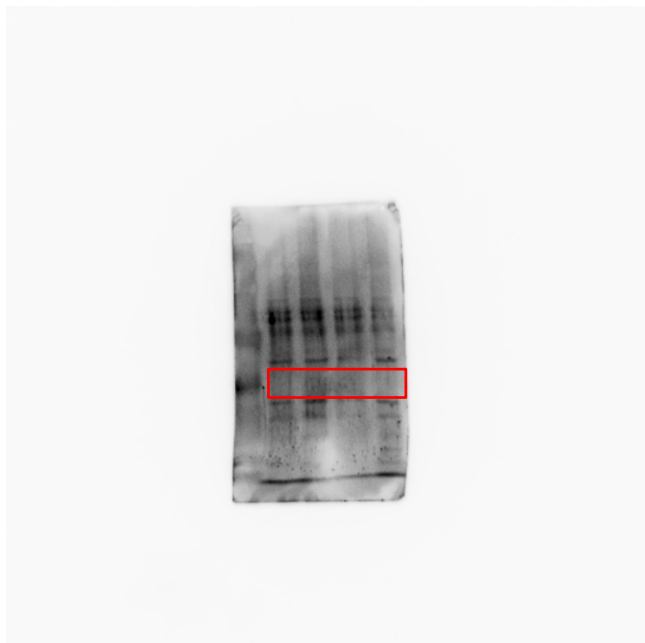

**S100A10**

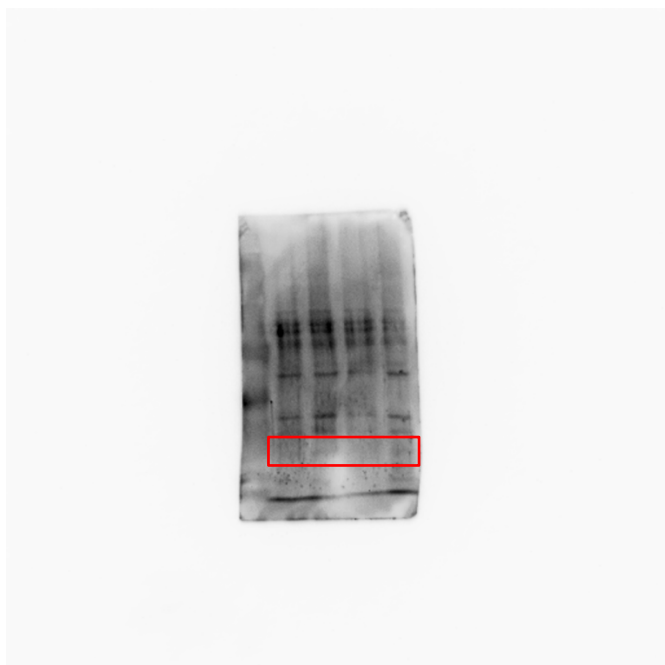

**Figure 7G**

**AGT**

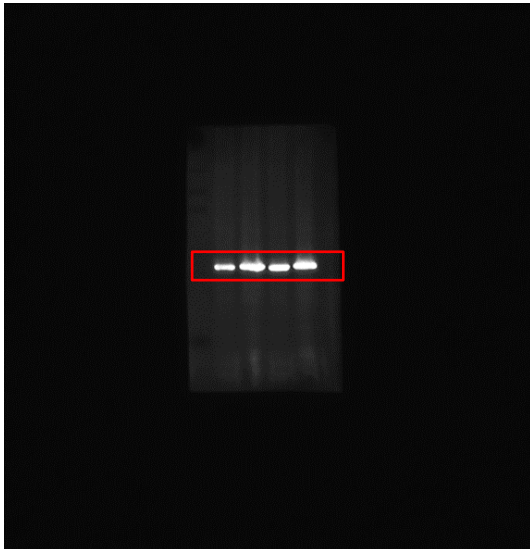

**Renin**

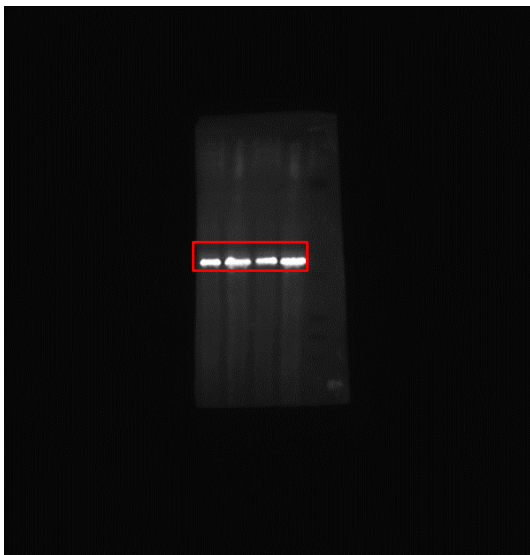

**AT<sub>1</sub>**

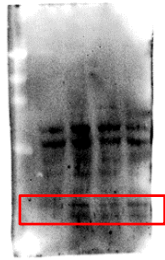

**AT<sub>2</sub>**

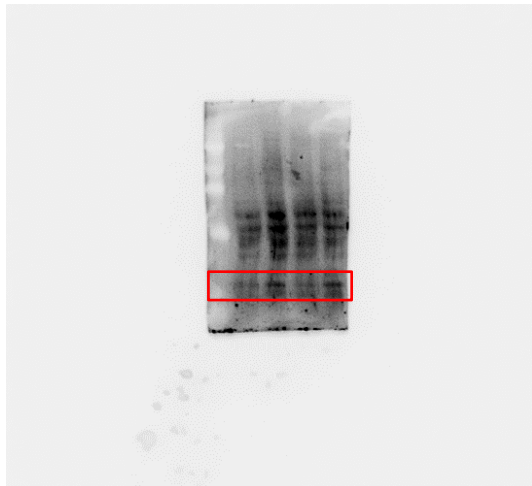

**Beta actin**

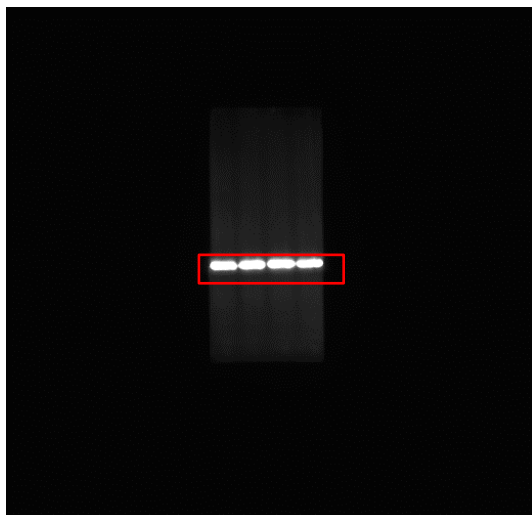

Supplement: Supplementary file 1 — Supplemental Figures [file 41598_2019_42746_MOESM1_ESM.pdf]
